# Supplementary material for: Single-cell epigenomic variability reveals functional cancer heterogeneity
Source: PubMed Central journal article supplement (PMC5259890; doi:10.1186/s13059-016-1133-7), 2017-01-24

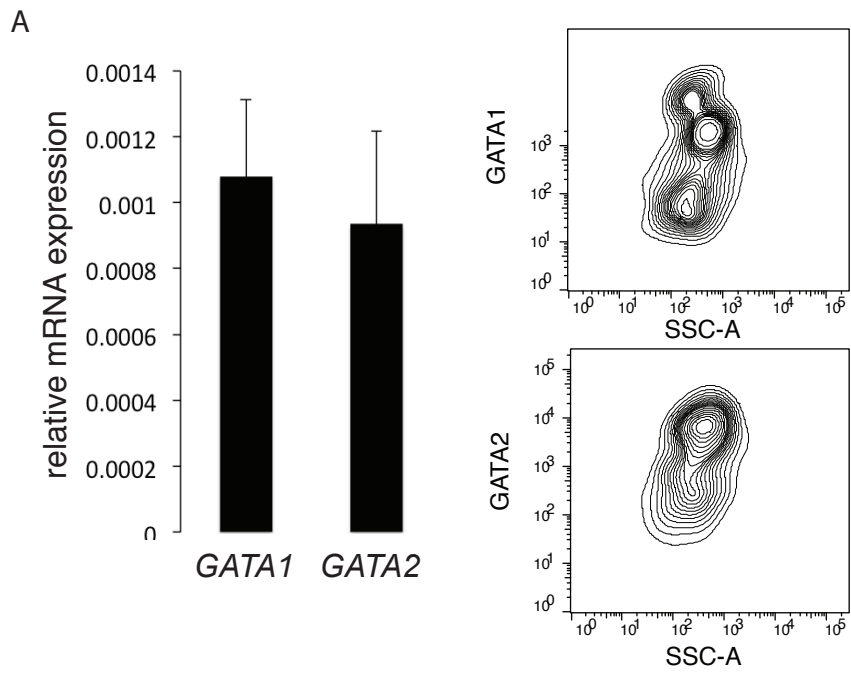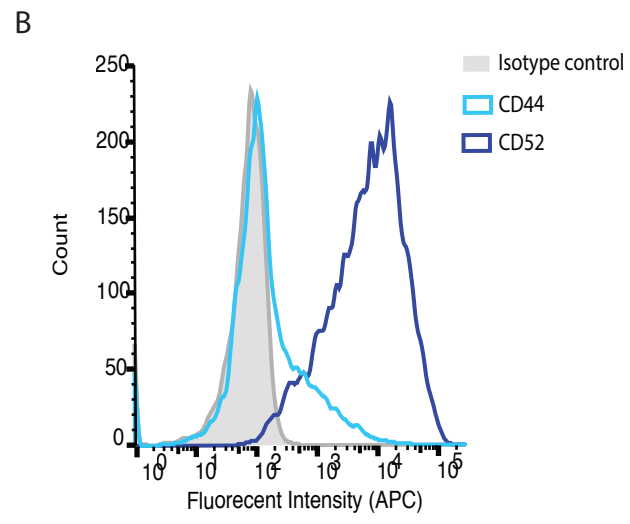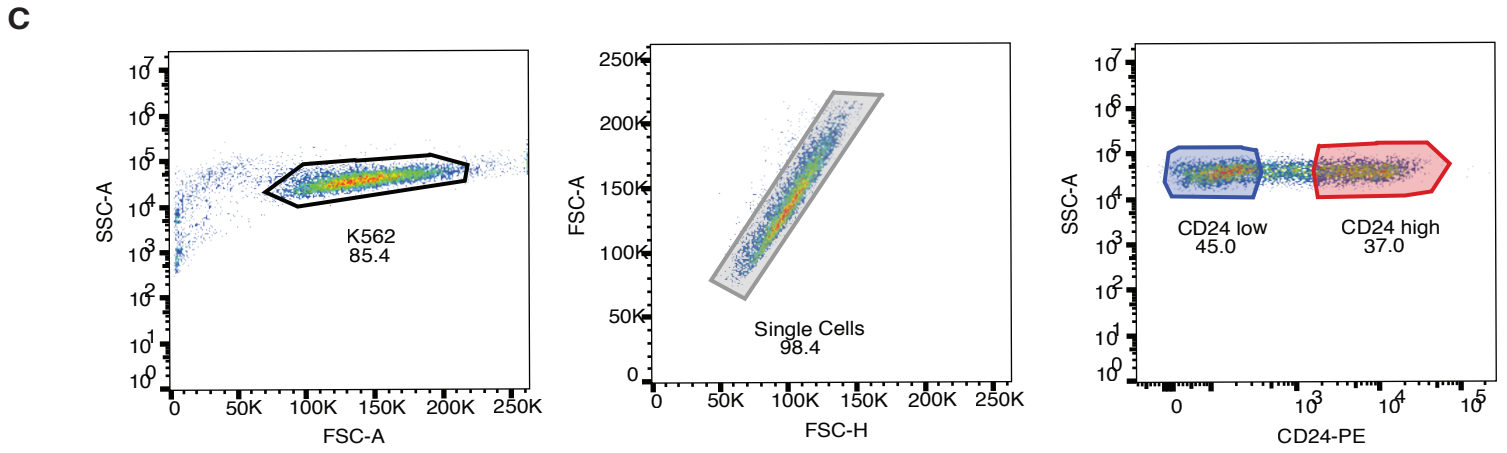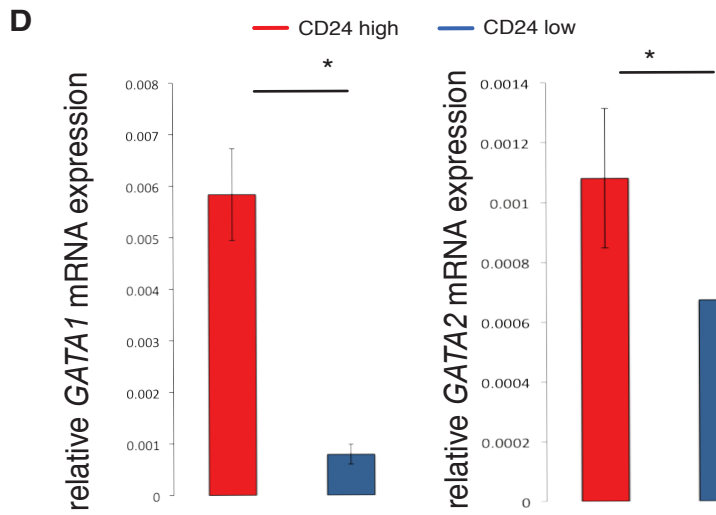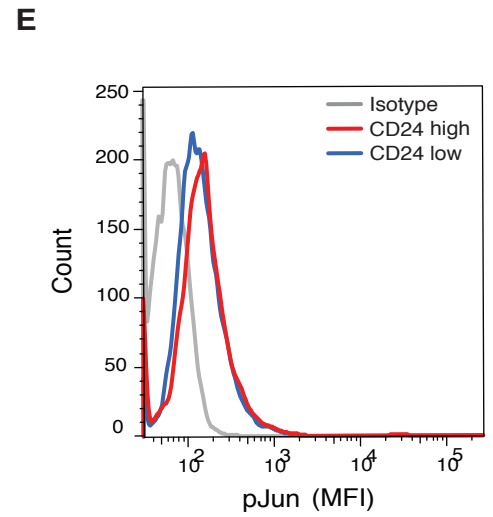

Supplement: 13059_2016_1133_MOESM1_ESM.pdf [file 13059_2016_1133_MOESM1_ESM.pdf]
