# Supplementary material for: Single-cell epigenomic variability reveals functional cancer heterogeneity
Source: PubMed Central journal article supplement (PMC5259890; doi:10.1186/s13059-016-1133-7), 2017-01-24

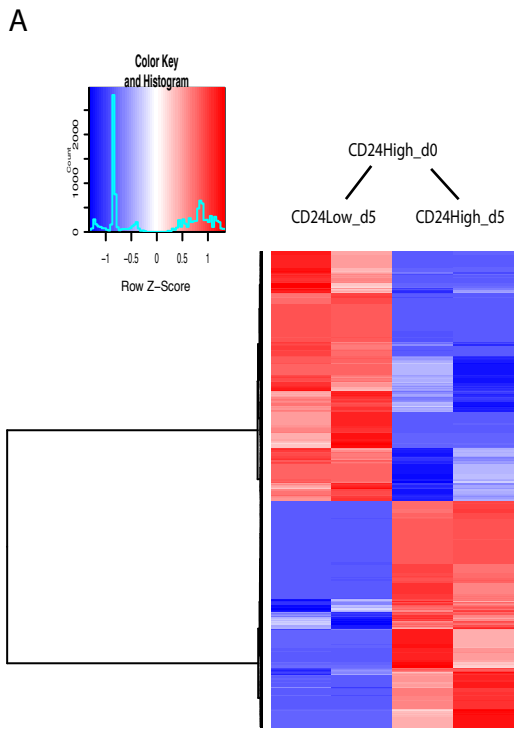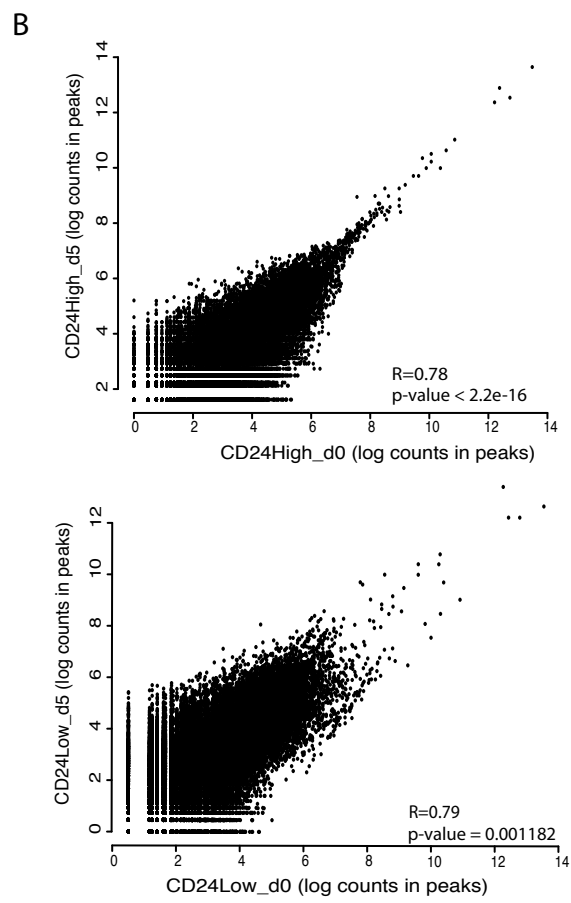

**C**

| cell type       | factor   | odds ratio  |
|-----------------|----------|-------------|
| K562            | GATA1    | 3.178284318 |
| K562            | GATA-2   | 1.69448295  |
| K562            | c-Jun    | 1.884249584 |
| K562            | eGFP-FOS | 1.59137467  |
| Proerythroblast | TAL1     | 2.770485032 |
| Erythroblast    | SMAD1    | 6.298336296 |

| cell type | factor | odds ratio  |
|-----------|--------|-------------|
| K562      | TBP    | 2.945140764 |
| K562      | PHF8   | 2.717283073 |
| K562      | ELF1   | 2.846414281 |
| K562      | Pol2   | 2.676088652 |
| K562      | Egr-1  | 2.545006798 |
| K562      | SIRT6  | 3.260518086 |

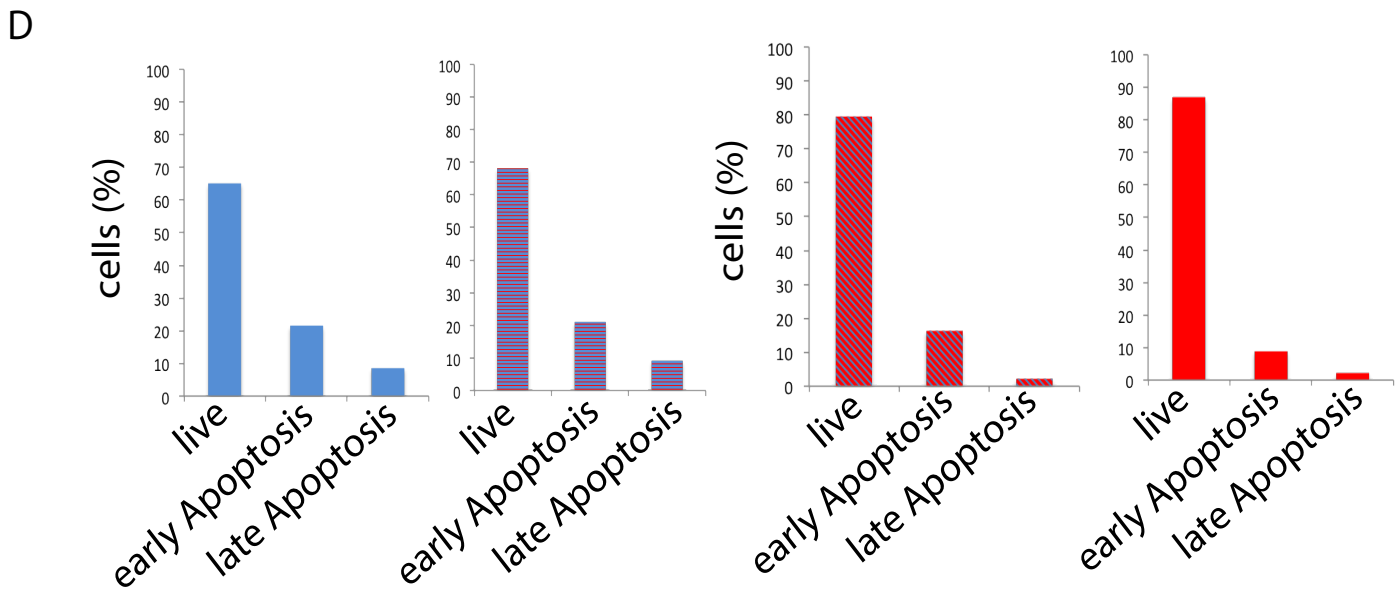

Supplement: 13059_2016_1133_MOESM4_ESM.pdf [file 13059_2016_1133_MOESM4_ESM.pdf]
